# Supplementary material for: Coexistence of magnetic and electric orderings in a divalent Cr2+-based multiaxial molecular ferroelectric
Source: Royal Society of Chemistry journal article supplement (doi:10.1039/d1sc01871j), 2021-01-01
Supplement: d1sc01871j1.pdf [file d1sc01871j1.pdf]

## Electronic Supplementary Information

### Coexistence of Magnetic and Electric Orderings in a Divalent $\text{Cr}^{2+}$ -Based Multiaxial Molecular Ferroelectric

Yong Ai,<sup>a†</sup> Rong Sun,<sup>b†</sup> Yu-Ling Zeng,<sup>a</sup> Jun-Chao Liu,<sup>a</sup> Yuan-Yuan Tang,<sup>a</sup> Bing-Wu Wang,<sup>b</sup> Zhe-Ming Wang,<sup>b</sup> Song Gao,<sup>\*b</sup> and Ren-Gen Xiong<sup>\*a</sup>

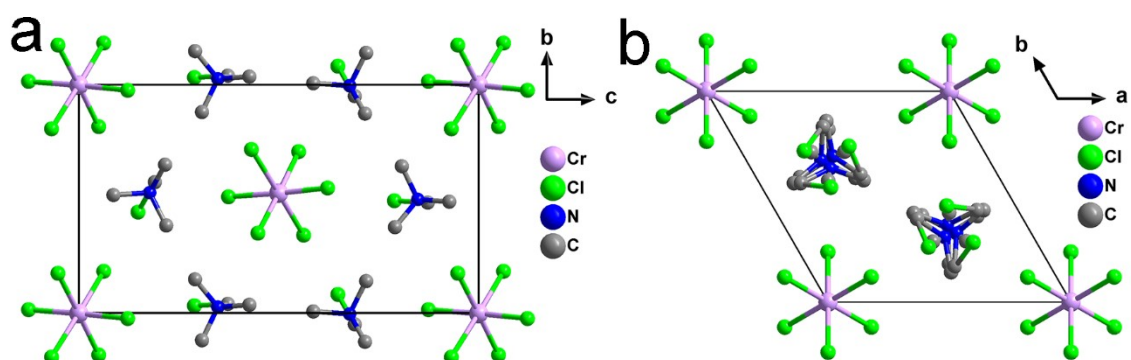

**Figure S1.** Packing view of crystal structures for TMCM- $\text{CrCl}_3$  in (a) LTP and (b) HTP. H atoms were omitted for clarity.

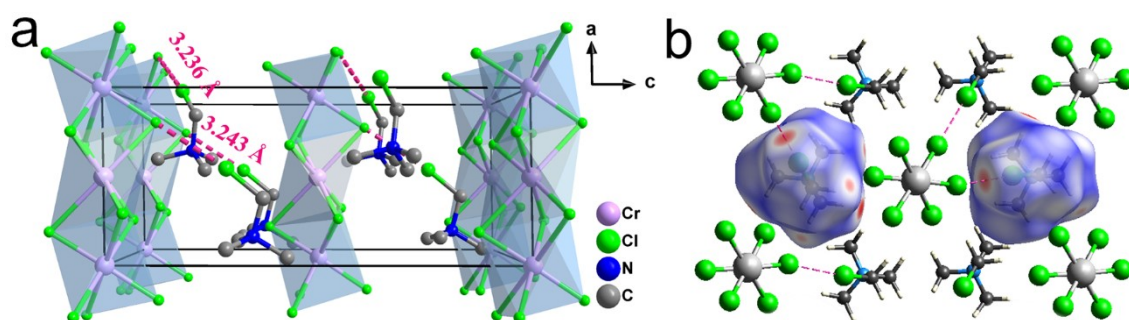

**Figure S2.** (a) Packing view of crystal structure for TMCM- $\text{CrCl}_3$  along  $b$ -axis in LTP. (b) Hirshfeld  $d_{\text{norm}}$  surfaces of TMCM cations in TMCM- $\text{CrCl}_3$  in LTP. The pink dotted lines represent the  $\text{C}-\text{Cl}\cdots\text{Cl}-\text{Cr}$  halogen bonds. H atoms were omitted for clarity.

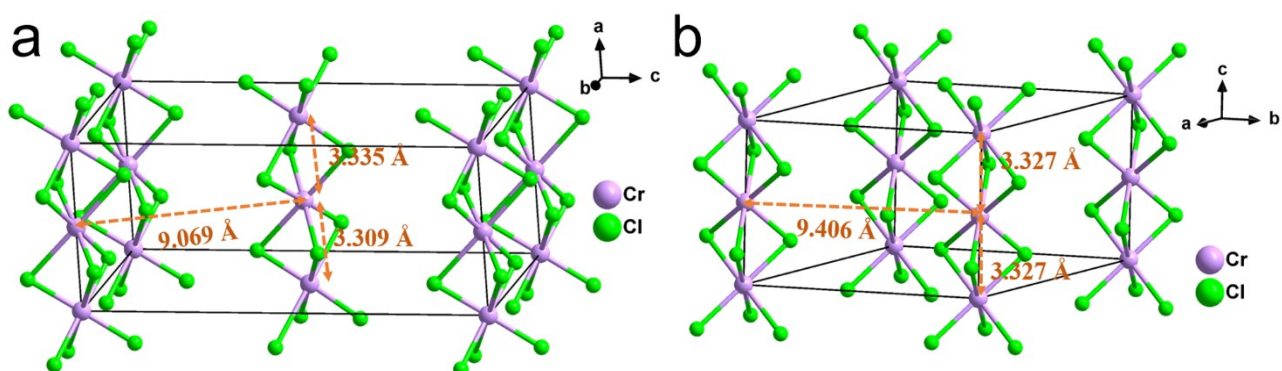

**Figure S3.** Packing view of crystal structures for TMCM-CrCl<sub>3</sub> in (a) LTP and (b) HTP. The brown dashed lines represent the distances between adjacent Cr atoms. TMCM cations were omitted for clarity.

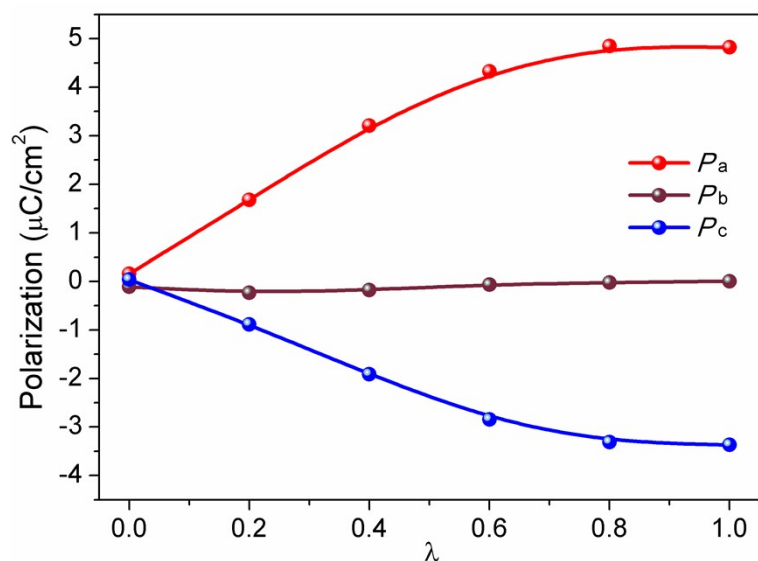

**Figure S4.** Ferroelectric polarization evolution of TMCM-CrCl<sub>3</sub> as a function of structure parameter  $\lambda$ .

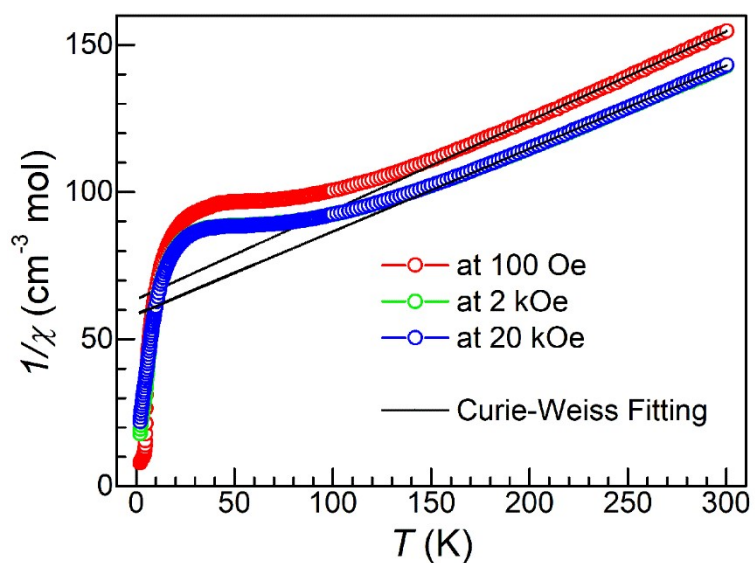

**Figure S5.** Temperature dependences of  $1/\chi$  for TMCM-CrCl<sub>3</sub> measured in the temperature range of 2-300 K. The black solid lines are fitted by the Curie-Weiss law.

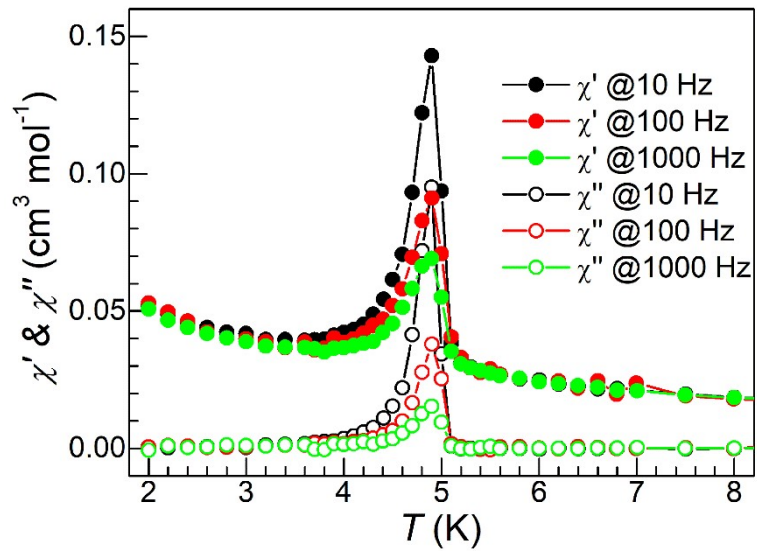

**Figure S6.** The frequency-independent peaks on ac susceptibilities data for TMCM-CrCl<sub>3</sub>.

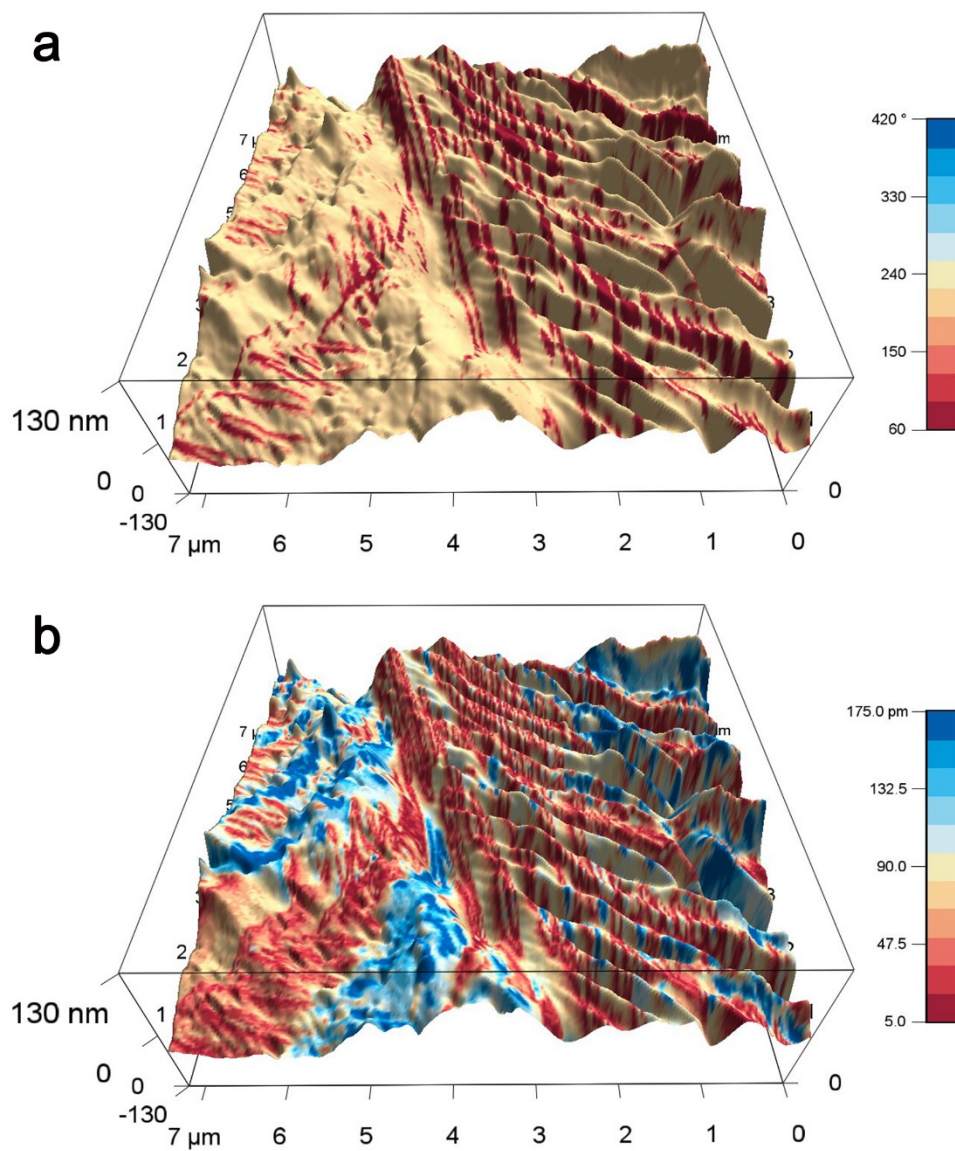

**Figure S7.** Phase mapping (a) and amplitude mapping (b) of the vertical PFM overlaid on the 3D topography for the thin film of TMCM-CrCl<sub>3</sub>.



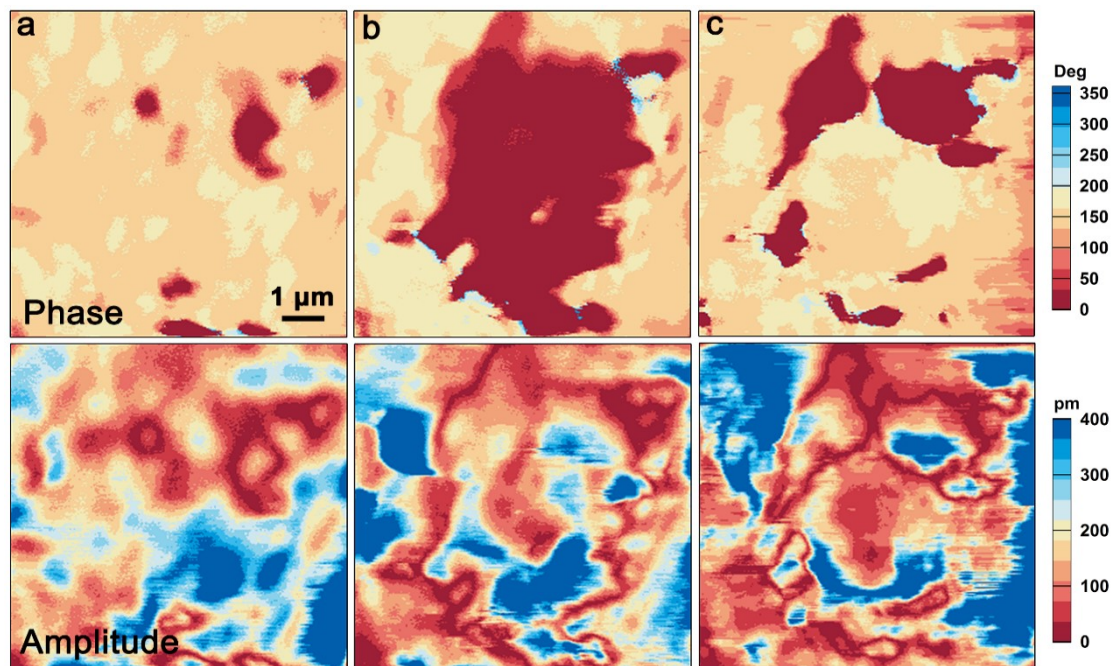

**Figure S8.** Vertical PFM phase (top) and amplitude (bottom) images of the thin film for TMCM-CrCl<sub>3</sub>. (a) Initial state. (b) After the first switching with negative bias at -50 V. (c) After the succeeding switching with positive bias at +30 V.

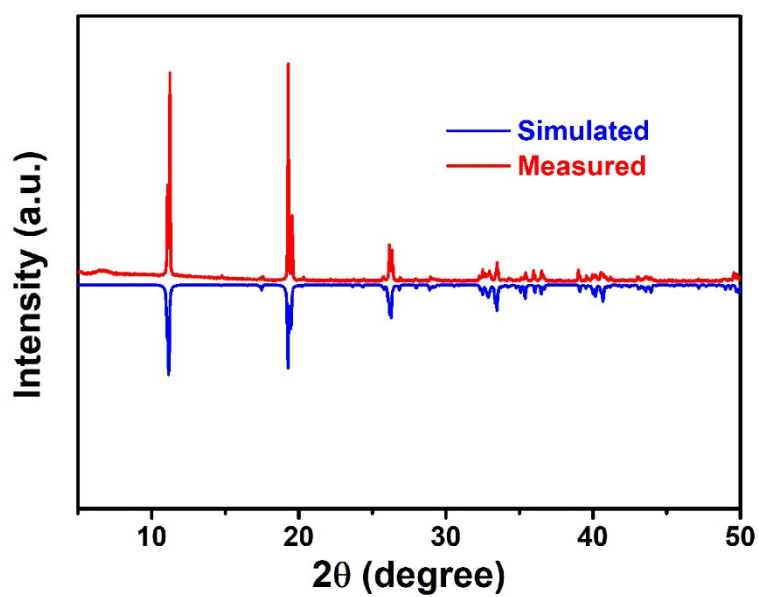

**Figure S9.** The measured PXRD pattern of TMCM-CrCl<sub>3</sub> at 293 K match well with the simulated one from crystal data in LTP, verifying the good phase purity.

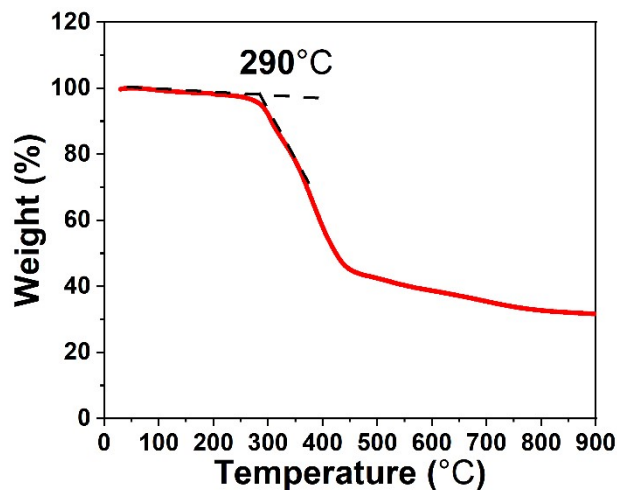

**Figure S10.** TGA plot of TMCM-CrCl<sub>3</sub>, measured under nitrogen atmosphere.

**Table S1.** Crystal data and structure refinement for TMCM-CrCl<sub>3</sub>.

| Compound                   | TMCM-CrCl <sub>3</sub>                             |                         |
|----------------------------|----------------------------------------------------|-------------------------|
| Formula                    | C <sub>4</sub> H <sub>11</sub> ClCrCl <sub>3</sub> |                         |
| Temperature                | 223 K                                              | 415 K                   |
| Weight                     | 533.88                                             | 266.96                  |
| Crystal system             | Monoclinic                                         | Hexagonal               |
| Space group                | <i>Pc</i>                                          | <i>P6<sub>3</sub>/m</i> |
| <i>a</i> (Å)               | 6.6436(7)                                          | 9.4058(10)              |
| <i>b</i> (Å)               | 9.1155(10)                                         | 9.4058(10)              |
| <i>c</i> (Å)               | 16.003(19)                                         | 6.6531(8)               |
| $\alpha$                   | 90                                                 | 90                      |
| $\beta$ (°)                | 90.97                                              | 90                      |
| $\gamma$                   | 90                                                 | 120                     |
| <i>V</i> (Å <sup>3</sup> ) | 969.0(12)                                          | 509.74(12)              |
| <i>Z</i>                   | 2                                                  | 2                       |
| <i>R</i> <sub>int</sub>    | 0.1300                                             | 0.0805                  |

|        |        |        |
|--------|--------|--------|
| $R_1$  | 0.0861 | 0.1247 |
| $wR_2$ | 0.2438 | 0.3474 |
| GOF    | 1.002  | 1.006  |

**Table S2.** Selected bond lengths [Å] and bond angles [°] for TMCM-CrCl<sub>3</sub>.

| Temperature            | bond lengths [Å] and bond angles [°] |                       |                            |                      |           |
|------------------------|--------------------------------------|-----------------------|----------------------------|----------------------|-----------|
| <b>223 K</b>           | Cr1—Cl1                              | 2.382 (5)             | Cr2—Cl6                    | 2.398 (6)            |           |
|                        | Cr1—Cl4                              | 2.411 (5)             | Cr2—Cl2 <sup>i</sup>       | 2.467 (5)            |           |
|                        | Cr1—Cl3                              | 2.450 (5)             | Cr2—Cl3                    | 2.470 (5)            |           |
|                        | Cr1—Cl2                              | 2.473 (5)             | Cl2—Cr2 <sup>ii</sup>      | 2.467 (5)            |           |
|                        | Cr2—Cl5                              | 2.377 (6)             |                            |                      |           |
|                        | Cl1—Cr1—Cl4                          | 177.6 (2)             | Cl5—Cr2—Cl2 <sup>i</sup>   | 92.48 (19)           |           |
|                        | Cl1—Cr1—Cl3                          | 92.49 (16)            | Cl6—Cr2—Cl2 <sup>i</sup>   | 87.16 (18)           |           |
|                        | Cl4—Cr1—Cl3                          | 87.83 (19)            | Cl5—Cr2—Cl3                | 87.18 (19)           |           |
|                        | Cl1—Cr1—Cl2                          | 87.59 (19)            | Cl6—Cr2—Cl3                | 93.05 (18)           |           |
|                        | Cl4—Cr1—Cl2                          | 92.04 (16)            | Cl2 <sup>i</sup> —Cr2—Cl3  | 177.3 (2)            |           |
|                        | Cl3—Cr1—Cl2                          | 178.8 (2)             | Cr1—Cl3—Cr2                | 85.37 (16)           |           |
|                        | Cl5—Cr2—Cl6                          | 177.4 (2)             | Cr2 <sup>ii</sup> —Cl2—Cr1 | 84.09 (15)           |           |
|                        | <b>415 K</b>                         | Cr1—Cl1 <sup>i</sup>  | 2.552 (5)                  | Cr1—Cl1 <sup>v</sup> | 2.552 (5) |
|                        |                                      | Cr1—Cl1 <sup>ii</sup> | 2.552 (5)                  | Cr1—Cl1              | 2.552 (5) |
| Cr1—Cl1 <sup>iii</sup> |                                      | 2.552 (5)             | Cl1—Cr1 <sup>vi</sup>      | 2.552 (5)            |           |
| Cr1—Cl1 <sup>iv</sup>  |                                      | 2.552 (5)             |                            |                      |           |

|                                           |            |                                          |            |
|-------------------------------------------|------------|------------------------------------------|------------|
| Cl1 <sup>i</sup> —Cr1—Cl1 <sup>ii</sup>   | 180.0 (4)  | Cl1 <sup>iii</sup> —Cr1—Cl1 <sup>v</sup> | 82.12 (16) |
| Cl1 <sup>i</sup> —Cr1—Cl1 <sup>iii</sup>  | 82.12 (16) | Cl1 <sup>iv</sup> —Cr1—Cl1 <sup>v</sup>  | 180.0 (4)  |
| Cl1 <sup>ii</sup> —Cr1—Cl1 <sup>iii</sup> | 97.88 (16) | Cl1 <sup>i</sup> —Cr1—Cl1                | 97.88 (16) |
| Cl1 <sup>i</sup> —Cr1—Cl1 <sup>iv</sup>   | 97.88 (16) | Cl1 <sup>ii</sup> —Cr1—Cl1               | 82.12 (16) |
| Cl1 <sup>ii</sup> —Cr1—Cl1 <sup>iv</sup>  | 82.12 (16) | Cl1 <sup>iii</sup> —Cr1—Cl1              | 180.0      |
| Cl1 <sup>iii</sup> —Cr1—Cl1 <sup>iv</sup> | 97.88 (16) | Cl1 <sup>iv</sup> —Cr1—Cl1               | 82.12 (16) |
| Cl1 <sup>i</sup> —Cr1—Cl1 <sup>v</sup>    | 82.12 (16) | Cl1 <sup>v</sup> —Cr1—Cl1                | 97.88 (16) |
| Cl1 <sup>ii</sup> —Cr1—Cl1 <sup>v</sup>   | 97.88 (16) | Cr1 <sup>vi</sup> —Cl1—Cr1               | 81.3 (2)   |

---
