# Supplementary material for: Coexistence of magnetic and electric orderings in a divalent Cr2+-based multiaxial molecular ferroelectric
Source: Royal Society of Chemistry journal article supplement (doi:10.1039/d1sc01871j), 2021-01-01
Supplement: d1sc01871j2.pdf [file d1sc01871j2.pdf]

# New Chromium-Based Material with Both Ferromagnetic and Ferroelectric Properties

Chemical  
Science

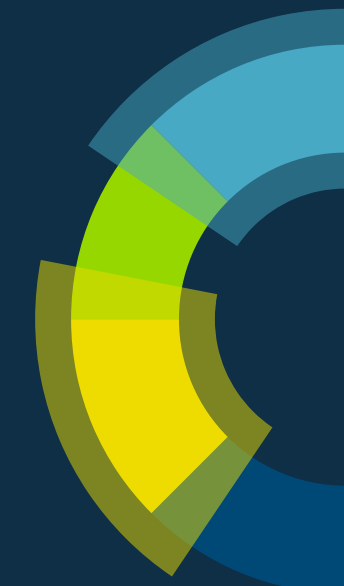

Materials with co-existing ferromagnetism and ferroelectricity can have a wide range of applications

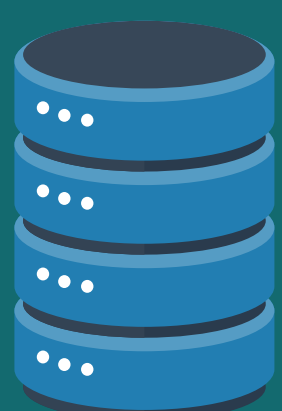

Information storage device

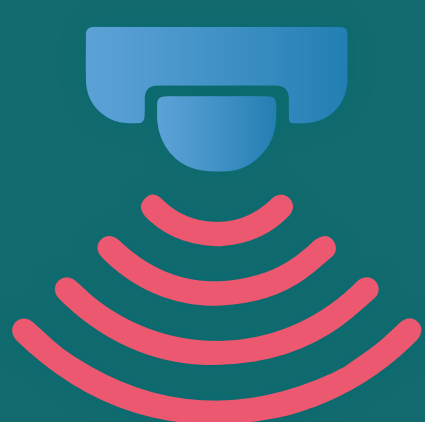

Magnetoelectric sensors

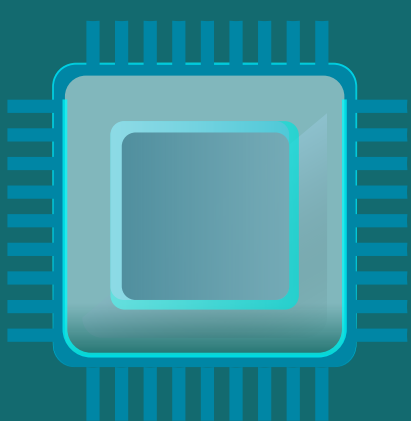

Memory components

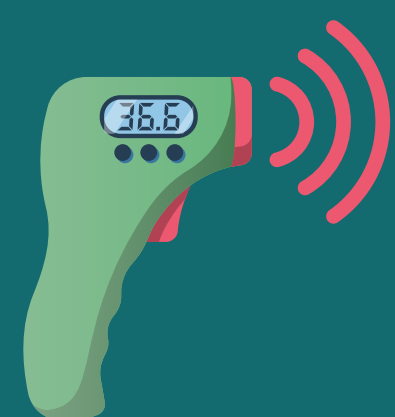

Infrared detectors

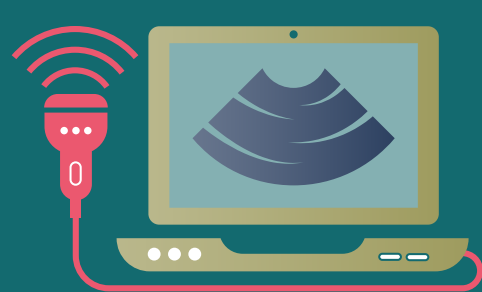

Ultrasound probes

Designing new organic-inorganic hybrid perovskite material with co-existing magnetic and electric orderings

Trimethylchloromethylammonium chromium chloride (TMCM-CrCl<sub>3</sub>)

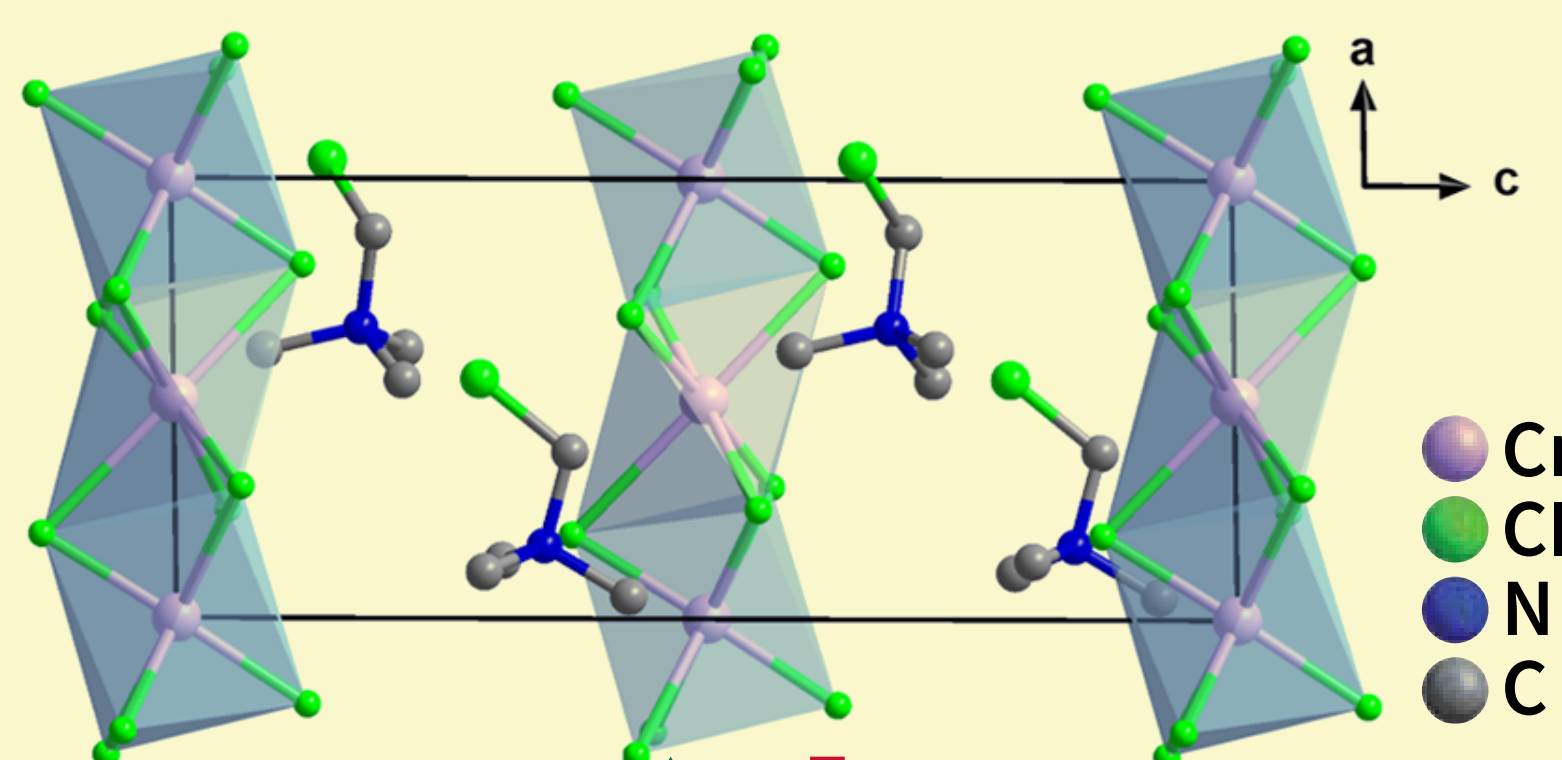

Ferroelectricity  
(ordered TMCM cations)

Weak ferromagnetism  
(strong Cr<sup>2+</sup>...Cr<sup>2+</sup>  
antiferromagnetic couplings  
with canted spins)

Heating

397 K

Cooling

Paraelectric  
(disordered TMCM cations)

Paramagnetic

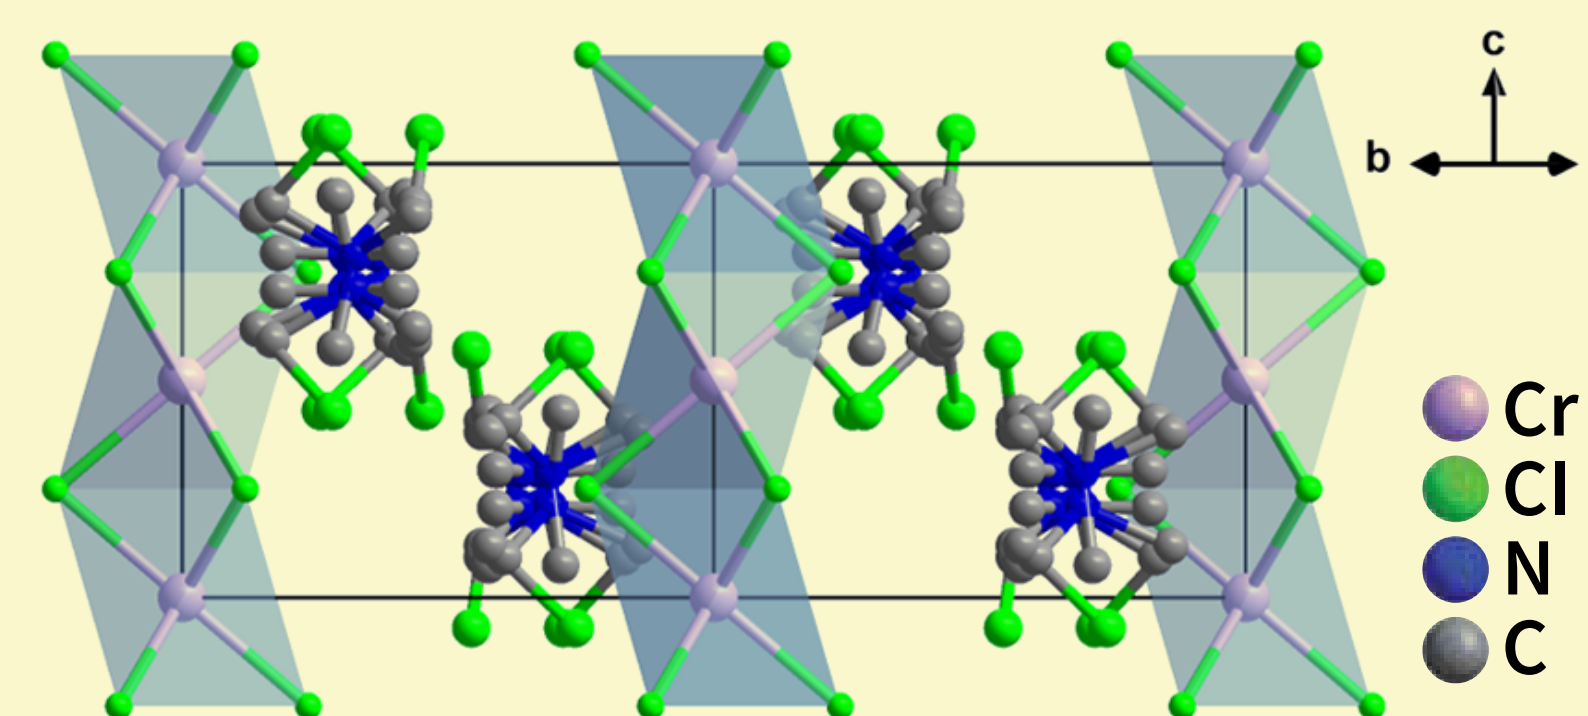

The study reveals a new category of materials with co-existing magnetic and electric ordering: chromium-based organic-inorganic perovskites
